# Supplementary material for: Comparative In Vitro Antioxidant Capacity and Terpenoid Profiling of Pumpkin Fruit Pulps from a Serbian Cucurbita maxima and Cucurbita moschata Breeding Collection
Source: MDPI journal article supplement (doi:10.3390/antiox10101580), 2021-10-07
Supplement: s1 [file s1]

|     | ABTS                        | FRAP                             | Carotenoid<br>content (mg/g) |
|-----|-----------------------------|----------------------------------|------------------------------|
|     | Trolox equivalent<br>(mM)   | Ascorbic acid<br>equivalent (mM) |                              |
| 1   | 0.11 ± 0.005 <sup>fg</sup>  | 0.04 ± 0.006 <sup>jk</sup>       | 0.27 ± 0.06 <sup>hij</sup>   |
| 2   | 0.20 ± 0.010 <sup>a</sup>   | 0.07 ± 0.010 <sup>bcd</sup>      | 0.34 ± 0.02 <sup>gh</sup>    |
| 3   | 0.15 ± 0.002 <sup>c</sup>   | 0.06 ± 0.003 <sup>cdefg</sup>    | 0.67 ± 0.14 <sup>f</sup>     |
| 4   | 0.17 ± 0.003 <sup>b</sup>   | 0.08 ± 0.003 <sup>bc</sup>       | 0.84 ± 0.08 <sup>e</sup>     |
| 13  | 0.10 ± 0.004 <sup>fgh</sup> | 0.04 ± 0.009 <sup>ijk</sup>      | 0.18 ± 0.02 <sup>ijk</sup>   |
| 20  | 0.14 ± 0.004 <sup>cd</sup>  | 0.07 ± 0.006 <sup>bcdef</sup>    | 0.29 ± 0.05 <sup>hi</sup>    |
| 22  | 0.13 ± 0.006 <sup>de</sup>  | 0.06 ± 0.003 <sup>cdefg</sup>    | 2.09 ± 0.11 <sup>a</sup>     |
| 23  | 0.11 ± 0.003 <sup>f</sup>   | 0.07 ± 0.003 <sup>bcdef</sup>    | 0.46 ± 0.09 <sup>g</sup>     |
| 26  | 0.09 ± 0.006 <sup>h</sup>   | 0.05 ± 0.009 <sup>ghijk</sup>    | 0.34 ± 0.04 <sup>gh</sup>    |
| 67  | 0.11 ± 0.003 <sup>f</sup>   | 0.08 ± 0.004 <sup>ab</sup>       | 0.15 ± 0.02 <sup>jk</sup>    |
| 173 | 0.13 ± 0.005 <sup>e</sup>   | 0.07 ± 0.003 <sup>bcde</sup>     | 1.17 ± 0.05 <sup>c</sup>     |
| 177 | 0.05 ± 0.003 <sup>i</sup>   | 0.04 ± 0.008 <sup>k</sup>        | 1.45 ± 0.06 <sup>b</sup>     |
| 212 | 0.16 ± 0.004 <sup>b</sup>   | 0.10 ± 0.010 <sup>a</sup>        | 1.01 ± 0.10 <sup>d</sup>     |
| 245 | 0.05 ± 0.002 <sup>i</sup>   | 0.05 ± 0.007 <sup>ghijk</sup>    | 0.17 ± 0.00 <sup>c</sup>     |
| 369 | 0.10 ± 0.005 <sup>fg</sup>  | 0.06 ± 0.008 <sup>efghij</sup>   | 0.36 ± 0.02 <sup>gh</sup>    |
| 370 | 0.17 ± 0.004 <sup>b</sup>   | 0.06 ± 0.001 <sup>defg</sup>     | 0.28 ± 0.06 <sup>hij</sup>   |
| 373 | 0.11 ± 0.008 <sup>fg</sup>  | 0.06 ± 0.006 <sup>defghi</sup>   | 0.24 ± 0.08 <sup>hij</sup>   |
| 377 | 0.12 ± 0.004 <sup>f</sup>   | 0.05 ± 0.009 <sup>hijk</sup>     | 0.09 ± 0.01 <sup>k</sup>     |
| 381 | 0.09 ± 0.004 <sup>gh</sup>  | 0.05 ± 0.004 <sup>hijk</sup>     | 0.28 ± 0.07 <sup>hij</sup>   |
| 384 | 0.14 ± 0.002 <sup>cd</sup>  | 0.06 ± 0.003 <sup>fghij</sup>    | 0.04 ± 0.01 <sup>k</sup>     |

The results were statistically analyzed using EXCEL with installed DSAASTAT add-in. In order to determine statistically significant differences between varieties, an analysis of variance was made. Multiple comparisons analyses were performed using Tukey HSD method ( $p < 0.05$ ).
