# Supplementary material for: Comparative In Vitro Antioxidant Capacity and Terpenoid Profiling of Pumpkin Fruit Pulps from a Serbian Cucurbita maxima and Cucurbita moschata Breeding Collection
Source: MDPI journal article supplement (doi:10.3390/antiox10101580), 2021-10-07
Supplement: s1 [file s1]

## Pumpkins Weight, Length and Diameter

| Plot number | Accession     | Fruit weight (kg) | Fruit length (cm) | Fruit diameter (cm) |
|-------------|---------------|-------------------|-------------------|---------------------|
| 1           | Max 113       | 4.95              | 28.5              | 27.82               |
| 2           | Max 118-1     | 3.78              | 18.77             | 22.02               |
| 3           | Max 118-2     | 8.02              | 29.76             | 33.88               |
| 4           | Max 117       | 5.97              | 24.5              | 29.81               |
| 13          | Max 37        | 4.64              | 23.2              | 19.78               |
| 20          | Mo 31         | 1.88              | 33.01             | 13.05               |
| 22          | Mo 39         | 1.85              | 30.5              | 13.11               |
| 23          | Mo 2          | 2.12              | 30.04             | 16.56               |
| 26          | Mo 29         | 2.37              | 27.12             | 12.35               |
| 67          | Hokk 54-1     | 1.02              | 11.02             | 17.25               |
| 173         | Max 35        | 3.65              | 12.07             | 29.84               |
| 177         | Max 65-1      | 6.33              | 21.44             | 27.13               |
| 212         | Max 1         | 8.96              | 38.25             | 33.14               |
| 245         | Max 105       | 13.08             | 34.58             | 42.02               |
| 369         | Mo 29-1       | 2.73              | 37.05             | 16.14               |
| 370         | Mo 29-2       | 1.73              | 31.11             | 16.6                |
| 373         | Mo 38         | 2.06              | 39.72             | 13.22               |
| 377         | Mo 32         | 2.4               | 37.15             | 16.42               |
| 381         | Mo F1 35 x 38 | 3.96              | 30.23             | 17.06               |
| 384         | Max 122       | 6.93              | 20.17             | 30.41               |
